# Supplementary material for: A systematic review of the relationships between social capital and socioeconomic inequalities in health: a contribution to understanding the psychosocial pathway of health inequalities
Source: Springer Nature journal article supplement (doi:10.1186/1475-9276-12-54), 2013-01-01
Supplement: 12939_2013_385_MOESM7_ESM.pdf [file 12939_2013_385_MOESM7_ESM.pdf]

### STEP 1: Identification

Studies excluded from review

Results obtained from MEDLINE,  
EMBASE and CINAHL:

**N = 860**

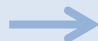

N = 243 Duplicates

### STEP 2: Screening titles

Results screened for eligibility:

**N = 617**

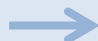

N = 354 Title did not include  
SES and/or health  
inequalities + social  
capital

Agreed to include:

**N = 164**

Disagreement:

**N = 99**

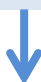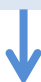

### STEP 3: Screening abstracts

Abstracts screened

**N = 264**

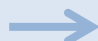

N = 141 No analysis of socio-  
economic inequalities in  
health in relation to social  
capital

Agreed to include:

**N = 50**

Disagreement:

**N = 73**

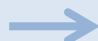

N = 37 Focus on ethnic or  
gender inequalities

**N = 36**

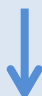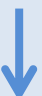

Full-texts reviewed:

**N = 86**

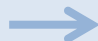

N = 26 Grey literature  
Reviews/ background  
papers

Total included in analysis:

**N = 60**

No full-text available
