# Supplementary figures and images for: A systematic review of the relationships between social capital and socioeconomic inequalities in health: a contribution to understanding the psychosocial pathway of health inequalities
Source: Springer Nature journal article supplement (doi:10.1186/1475-9276-12-54), 2013-01-01

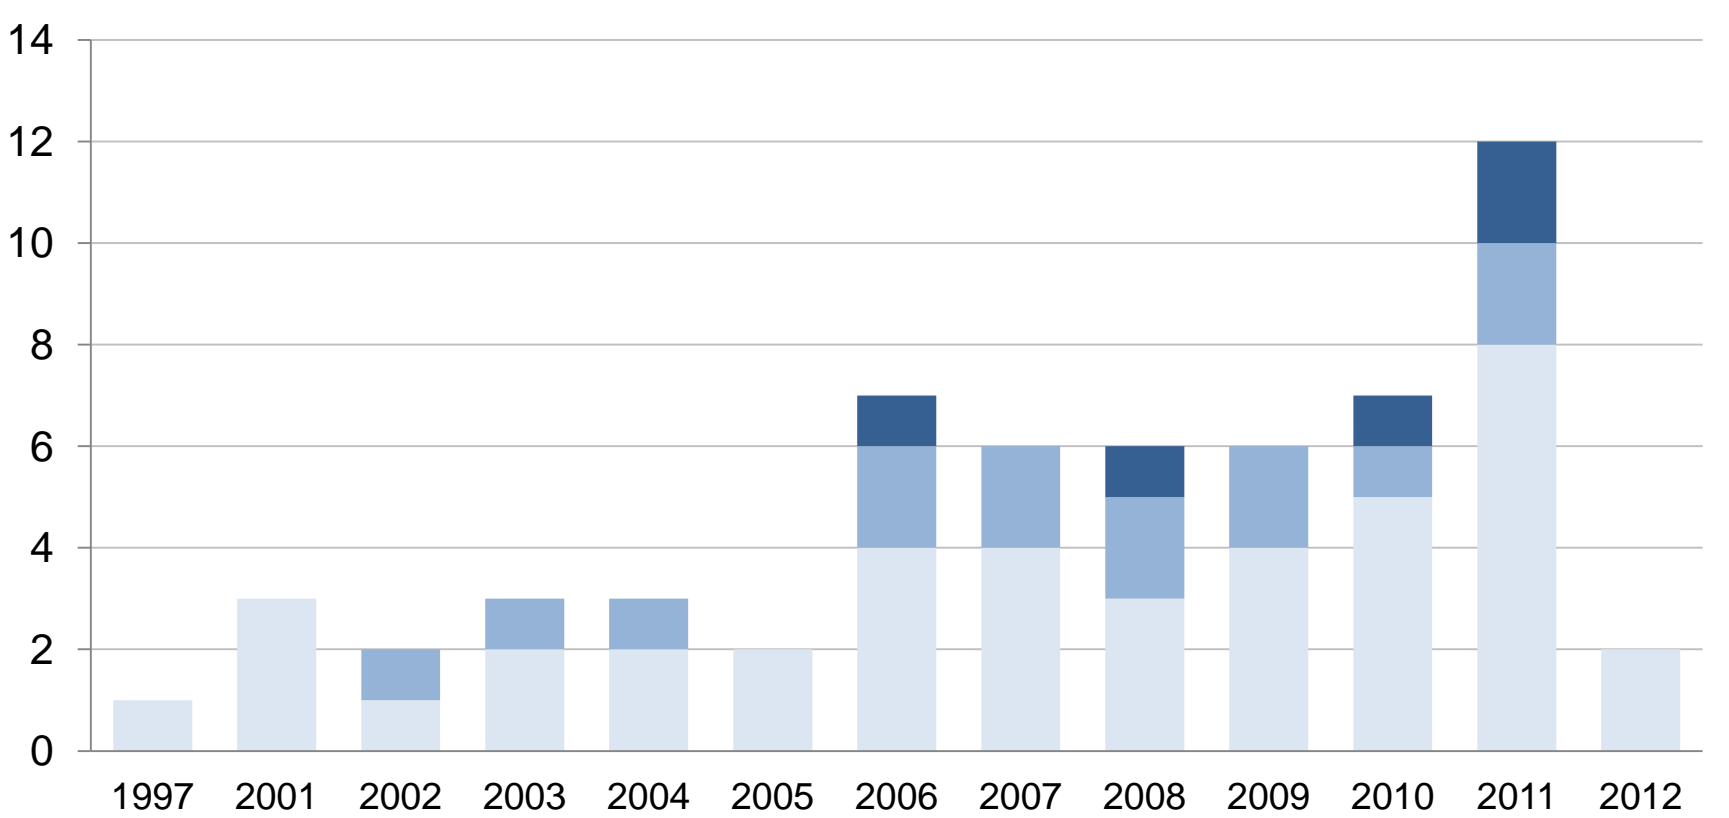

Supplement: 12939_2013_385_MOESM8_ESM.pdf [file 12939_2013_385_MOESM8_ESM.pdf]
